# Supplementary material for: Unveiling the electronic structure peculiarities of phosphine selenides as NMR probes for non-covalent interactions: an experimental and theoretical study
Source: Royal Society of Chemistry journal article supplement (doi:10.1039/d4cp01191k), 2024-01-01
Supplement: d4cp01191k2.pdf [file d4cp01191k2.pdf]

*Supporting Information for*

**Unveiling the Electronic Structure Peculiarities of Phosphine Selenides as NMR Probes for Non-covalent Interactions: An Experimental and Theoretical Study**

Danil V. Krutin, Anton S. Zakharov, Elena Yu. Tupikina, Valeriya V. Mulloyarova<sup>\*a</sup>

<sup>a</sup> – Institute of Chemistry, St. Petersburg State University, St. Petersburg, Russia

<sup>\*</sup> – Corresponding author: Dr. V.V. Mulloyarova (vmulloyarova@gmail.com)

Table of contents

|                   |                                                                                                                                                               |           |
|-------------------|---------------------------------------------------------------------------------------------------------------------------------------------------------------|-----------|
| <b>Table S1</b>   | X-ray structural parameters of the considered crystalline R <sub>3</sub> P=Se                                                                                 | <b>3</b>  |
| <b>Figure S1</b>  | Powder X-ray diffraction data of of triphenylphosphine selenide Me <sub>3</sub> P=Se                                                                          | <b>4</b>  |
| <b>Figure S2</b>  | Powder X-ray diffraction data of of triphenylphosphine selenide Et <sub>3</sub> P=Se                                                                          | <b>5</b>  |
| <b>Figure S3</b>  | Powder X-ray diffraction data of of triphenylphosphine selenide <i>t</i> -Bu <sub>3</sub> P=Se                                                                | <b>6</b>  |
| <b>Figure S4</b>  | Powder X-ray diffraction data of of triphenylphosphine selenide Ph <sub>3</sub> P=Se                                                                          | <b>7</b>  |
| <b>Figure S5</b>  | Dependence of the $\delta_{33}$ component of <sup>31</sup> P chemical shift anisotropy tensor with the P=Se bond length in R <sub>3</sub> P=Se in solid state | <b>8</b>  |
| <b>Figure S5</b>  | The <sup>31</sup> P and <sup>77</sup> Se NMR spectra of R <sub>3</sub> P=Se in solution in CDF <sub>3</sub> /CDCIF <sub>2</sub> at 100 K                      | <b>9</b>  |
| <b>Table S2</b>   | Geometric and spectral NMR parameters of phosphine selenides R <sub>3</sub> P=Se in solution                                                                  | <b>10</b> |
| <b>Table S3</b>   | Calculated geometry and spectral NMR parameters of phosphine selenides R <sub>3</sub> P=Se in vacuum                                                          | <b>11</b> |
| <b>Figure S7</b>  | Dependences of the $\delta_P$ NMR with the electron density values ( $\rho$ ) P=Se and P–C bonds                                                              | <b>12</b> |
| <b>Figure S8</b>  | Dependences of the $\delta_P$ NMR with the kinetic ( <i>G</i> ) energy densities of electrons P=Se and P–C bonds                                              | <b>13</b> |
| <b>Figure S9</b>  | Dependences of the $\delta_{Se}$ NMR with the electron density values ( $\rho$ ) P=Se and P–C bonds                                                           | <b>14</b> |
| <b>Figure S10</b> | Dependences of the $\delta_{Se}$ NMR with the kinetic ( <i>G</i> ) energy densities of electrons P=Se and P–C bonds                                           | <b>15</b> |

|                   |                                                                                                                                                                                                                                                                        |           |
|-------------------|------------------------------------------------------------------------------------------------------------------------------------------------------------------------------------------------------------------------------------------------------------------------|-----------|
| <b>Figure S11</b> | Dependences of the $^1J_{\text{PSe}}$ with the electron density Laplacian $\nabla^2\rho$ of electrons P=Se and P–C bonds                                                                                                                                               | <b>16</b> |
| <b>Figure S12</b> | A graphical visualization of donor-acceptor (DA) interactions of natural bonding orbitals (NBOs) on an example of <i>n</i> -Bu <sub>3</sub> PSe.                                                                                                                       | <b>17</b> |
| <b>Figure S13</b> | Dependences of the coupling constant $^1J_{\text{PSe}}$ with the energies of donor-acceptor interactions of natural bonding orbitals (NBO) in R <sub>3</sub> P=Se (where R=Me, Et, <i>n</i> -Bu, <i>t</i> -Bu and Ph) in vacuum and in solution in CDCl <sub>3</sub> . | <b>18</b> |
| <b>Figure S14</b> | Dependence of the $\delta\text{P}$ NMR with the P–C bond length in R <sub>3</sub> P=Se in vacuum, solution and solid state                                                                                                                                             | <b>19</b> |
| <b>Figure S15</b> | Dependence of the $\delta\text{Se}$ NMR with the P–C bond length in R <sub>3</sub> P=Se in vacuum, solution and solid state                                                                                                                                            | <b>20</b> |

**Table S1.** Geometry parameters of the considered crystalline phosphine selenides  $R_3P=Se$  (R=Me, Et, *t*-Bu, Ph). All distances are given in Å, angles ( $\angle$ ) – in degrees.

| CCDC          | R            | r(P–Se), Å | r(P–C), Å | $\angle$ (CPC), degree | $\angle$ (CPSe), degree |
|---------------|--------------|------------|-----------|------------------------|-------------------------|
| MEPNSE01 [32] | Me           | 2.123      | 1.799     | 112.7                  | 106.1                   |
| YOFTAR        | Et           | 2.126      | 1.810     | 113.5                  | 105.2                   |
| QIJFOE [26]   | <i>t</i> -Bu | 2.133      | 1.908     | 108.9                  | 110.0                   |
| TPPHSE02 [33] | Ph           | 2.115      | 1.817     | 112.6                  | 106.1                   |
|               | Ph           | 2.113      | 1.818     | 112.9                  | 106.0                   |

**Figure S1.** The powder X-ray patterns for studied polymorph of trimethylphosphine selenide  $\text{Me}_3\text{P}=\text{Se}$ (MEPNSE01). The space group  $P2_1/m$ , lattice parameters:  $a = 6.4683(4) \text{ \AA}$ ,  $b = 7.8246(8) \text{ \AA}$ ,  $c = 6.6154(6) \text{ \AA}$ ,  $\alpha = \gamma = 90^\circ$ ,  $\beta = 90.423(5)^\circ$ .

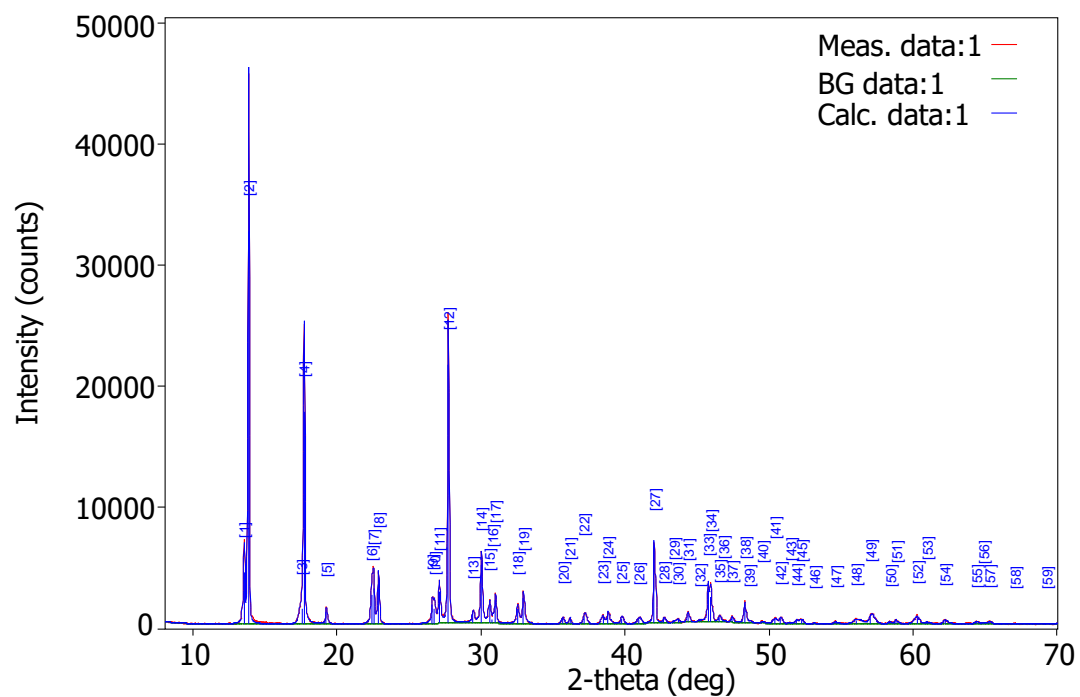

**Figure S2.** The powder X-ray patterns for studied polymorph of triethylphosphine selenide  $\text{Et}_3\text{P}=\text{Se}(\text{YOFTAR})$ . The space group  $P31c$ , lattice parameters:  $a = b = 9.0487 \text{ \AA}$ ,  $c = 6.5327 \text{ \AA}$ ,  $\alpha = \beta = 90^\circ$ .

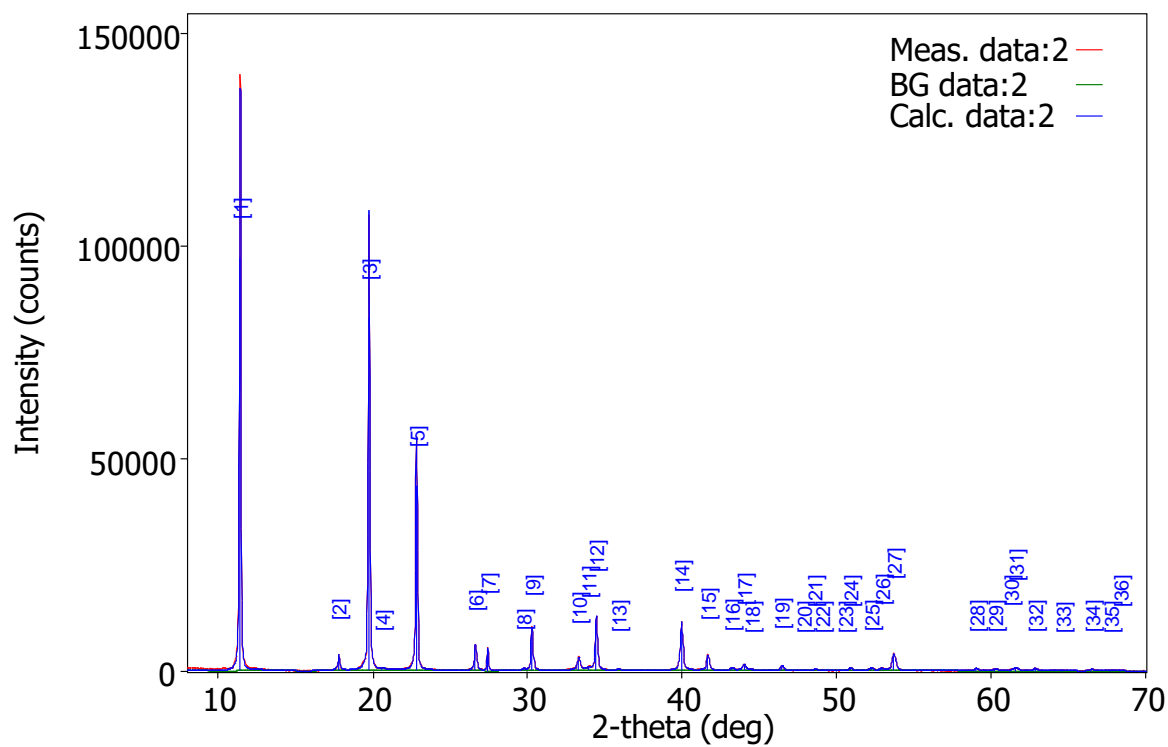

**Figure S3.** The powder X-ray patterns for studied polymorph of tris(*t*-butyl)phosphine selenide *t*-Bu<sub>3</sub>P=Se (QIJFOE). The space group  $Pa\bar{3}$ , lattice parameters:  $a = b = c = 14.5317(2)$  Å,  $\alpha = \beta = \gamma = 90^\circ$ .

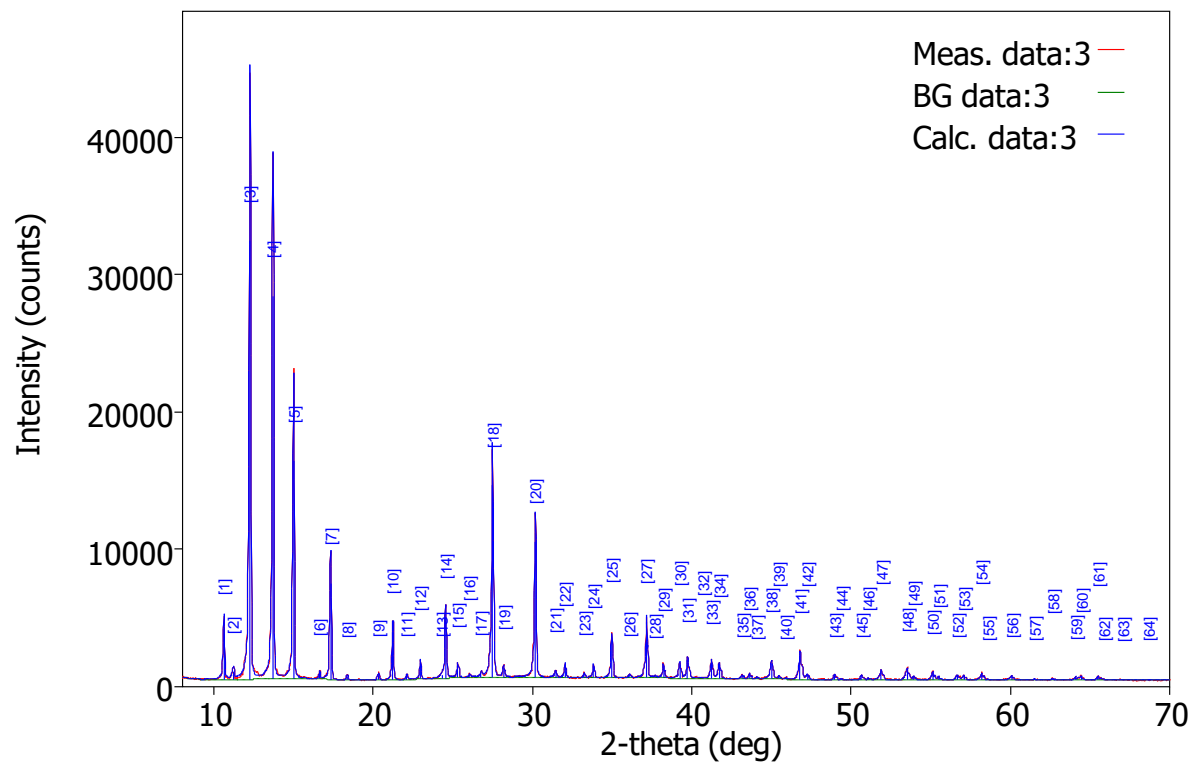

**Figure S4.** The powder X-ray patterns for studied polymorph of triphenylphosphine selenide  $\text{Ph}_3\text{P}=\text{Se}$  (TPPHSE02). The space group  $P2_1/c$ , lattice parameters:  $a = 18.451(3) \text{ \AA}$ ,  $b = 9.6728(17) \text{ \AA}$ ,  $c = 18.097(2) \text{ \AA}$ ,  $\alpha = \gamma = 90^\circ$ ,  $\beta = 106.777(10)^\circ$ .

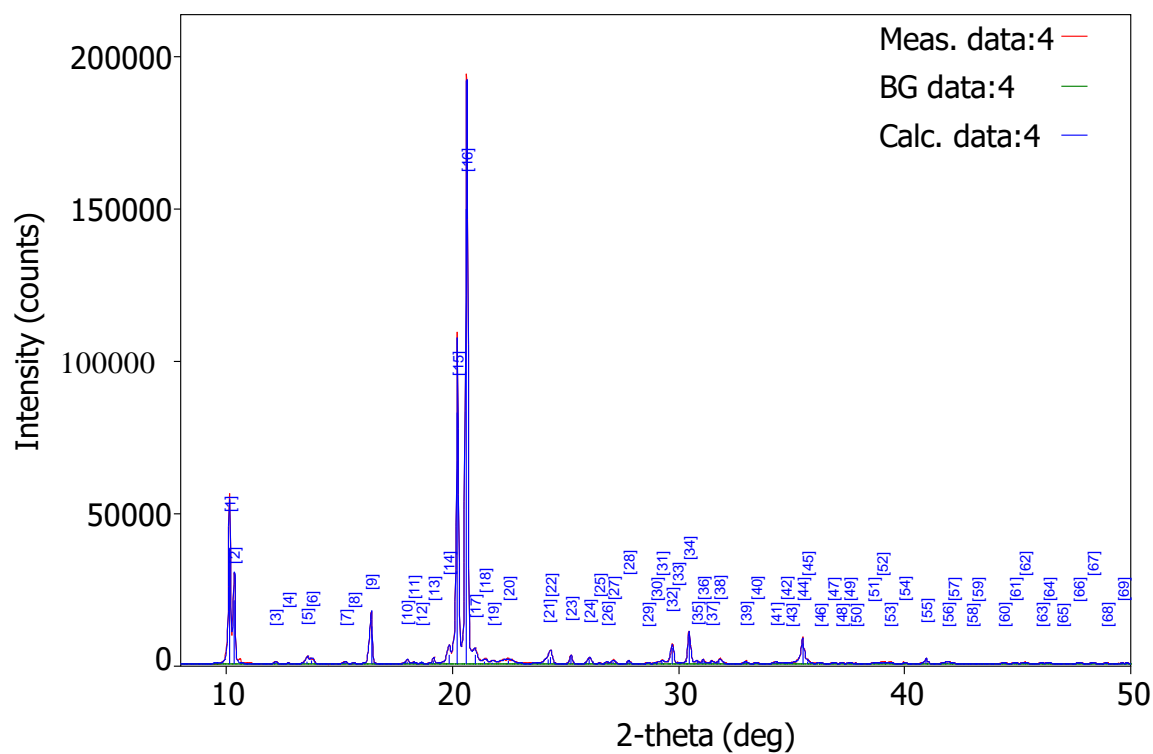

**Figure S5.** Dependence of the  $\delta_{33}$  component of  $^{31}\text{P}$  chemical shift anisotropy tensor with the P=Se bond length in studied phosphine selenides  $\text{R}_3\text{P}=\text{Se}$  (where  $\text{R}=\text{Me}$ ,  $\text{Et}$ ,  $t\text{-Bu}$  and  $\text{Ph}$ ) in solid state. The spectral parameters were obtained by static NMR spectra, and the geometric parameters – by X-ray analysis.

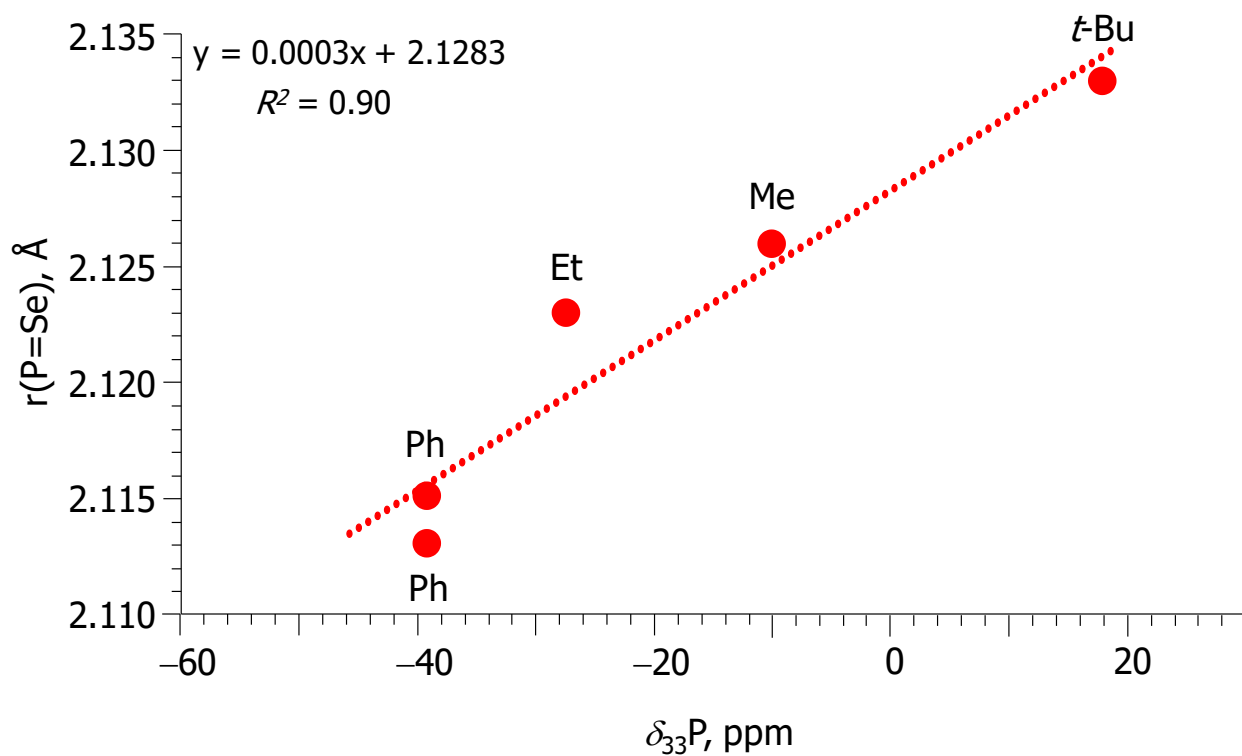



**Figure S6.** The  $^{31}\text{P}$  and  $^{77}\text{Se}$  NMR spectra of phosphine selenides  $\text{R}_3\text{P}=\text{Se}$  (where  $\text{R}=\text{Me}$ ,  $\text{Et}$ ,  $n\text{-Bu}$ ,  $t\text{-Bu}$ ,  $\text{Ph}$  and  $\text{MePh}_2$ ) in solution in  $\text{CDF}_3/\text{CDClF}_2$  at 100 K. In red and blue colours the values of  $^{31}\text{P}$  and  $^{77}\text{Se}$  NMR chemical shifts are marked respectively. In black color the values of coupling constant  $^1J_{\text{PSe}}$  are given.

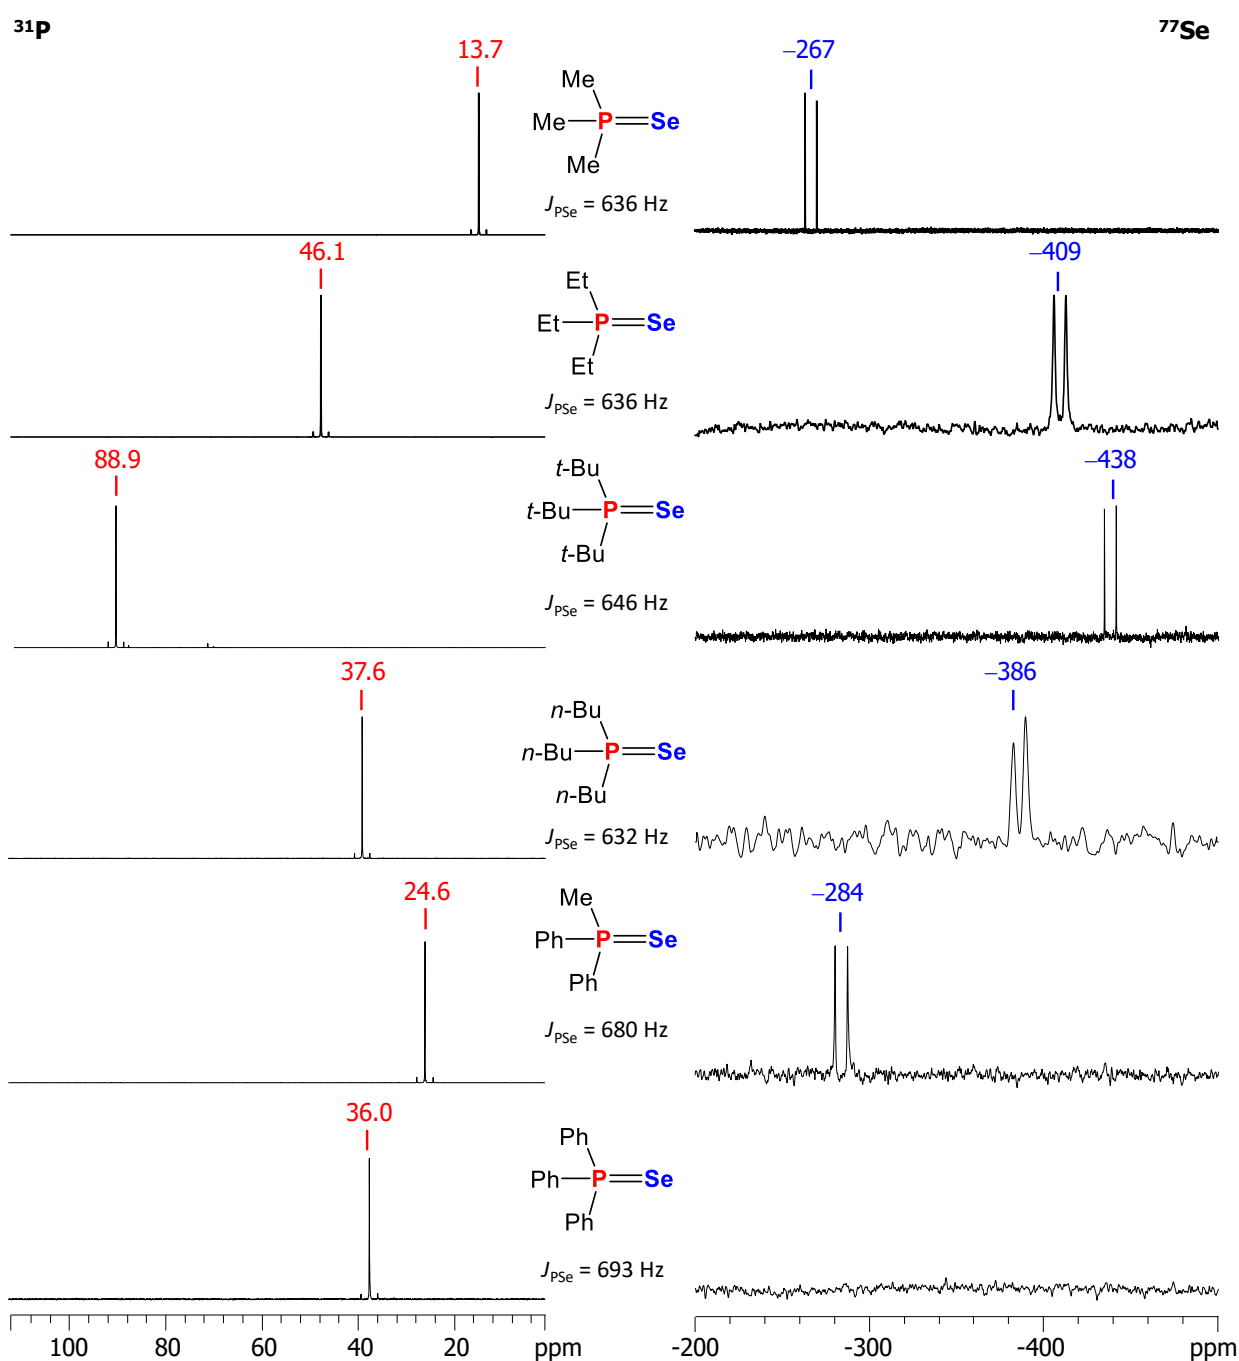

**Table S2.** Calculated (B3LYP/def2-TZVP) geometry and spectral NMR parameters of phosphine selenides  $R_3P=Se$  in solution. The distances are given in Å, angles ( $\angle$ ) – in degrees. The  $\delta P$  and  $\delta Se$  are presented in ppm and coupling constant values  $^1J_{PSe}$  – in Hz.

| R                 | r(P–Se),<br>Å | r(P–C),<br>Å   | r(C–C),<br>Å | $\angle$ (CPC),<br>degree | $\delta P$ ,<br>ppm | $\delta Se$ ,<br>ppm | $^1J_{PSe}$ ,<br>Hz |
|-------------------|---------------|----------------|--------------|---------------------------|---------------------|----------------------|---------------------|
| Me                | 2.151         | 1.813          | –            | 105.8                     | 56.8                | –289                 | 680                 |
| Et                | 2.153         | 1.829          | 1.528        | 105.3                     | 83.3                | –491                 | 680                 |
| <i>t</i> -Bu      | 2.174         | 1.929          | 1.540        | 108.9                     | 132.6               | –429                 | 721                 |
| <i>n</i> -Bu      | 2.155         | 1.827          | 1.529        | 105.7                     | 74.8                | –439                 | 674                 |
| Ph                | 2.149         | 1.820          | 1.397        | 106.5                     | 75.5                | –193                 | 764                 |
| MePh <sub>2</sub> | 2.147         | 1.819<br>1.816 | 1.397        | 105.9                     | 65.5                | –239                 | 719                 |

**Table S3.** Calculated geometry (PW6B95-GD3/def2-QZVP) and spectral (B97-2/pcsSeg-2) parameters of phosphine selenides  $R_3P=Se$  in vacuum. The distances are given in Å, angles ( $\angle$ ) – in degrees. The  $\delta^{31}P$  and  $\delta^{77}Se$  are presented in ppm and coupling constant values  $J_{P-Se}$  – in Hz.

| R                 | r(P–Se),<br>Å | r(P–C),<br>Å | $\angle$ (CPC),<br>degree | $\angle$ (CPSe),<br>degree | $\delta^{31}P$ ,<br>ppm | $\delta^{77}Se$ ,<br>ppm | $^1J_{PSe}$ ,<br>Hz |
|-------------------|---------------|--------------|---------------------------|----------------------------|-------------------------|--------------------------|---------------------|
| Me                | 2.090         | 1.809        | 104.1                     | 114.5                      | 32.0                    | –422                     | 739                 |
|                   |               | 1.809        | 104.1                     | 114.5                      |                         |                          |                     |
|                   |               | 1.809        | 104.0                     | 114.5                      |                         |                          |                     |
| Et                | 2.096         | 1.821        | 104.9                     | 113.0                      | 57.1                    | –530                     | 731                 |
|                   |               | 1.821        | 104.4                     | 114.3                      |                         |                          |                     |
|                   |               | 1.820        | 105.2                     | 114.1                      |                         |                          |                     |
| <i>n</i> -Bu      | 2.097         | 1.819        | 105.0                     | 113.1                      | 51.9                    | –509                     | 729                 |
|                   |               | 1.821        | 104.8                     | 114.3                      |                         |                          |                     |
|                   |               | 1.819        | 104.3                     | 114.3                      |                         |                          |                     |
| <i>t</i> -Bu      | 2.117         | 1.901        | 109.3                     | 109.6                      | 100.5                   | –529                     | 733                 |
|                   |               | 1.900        | 109.3                     | 109.7                      |                         |                          |                     |
|                   |               | 1.901        | 109.3                     | 109.7                      |                         |                          |                     |
| Ph                | 2.097         | 1.816        | 104.8                     | 113.8                      | 55.4                    | –434                     | 779                 |
|                   |               | 1.816        | 104.7                     | 113.9                      |                         |                          |                     |
|                   |               | 1.816        | 104.8                     | 113.9                      |                         |                          |                     |
| MePh <sub>2</sub> | 2.094         | 1.811 (Me)   | 103.5 (MPP)               | 113.8 (Me)                 | 41.5                    | –491                     | 777                 |
|                   |               | 1.819 (Ph)   | 104.4 (PPP)               | 114.7 (Ph)                 |                         |                          |                     |
|                   |               | 1.815 (Ph)   | 105.1 (PPM)               | 114.5 (Ph)                 |                         |                          |                     |

**Figure S7.** Dependences of the  $\delta P$  NMR with the electron density values ( $\rho$ ) at electron density critical points of type (3, -1) for P=Se and P-C bonds for  $R_3P=Se$  (where R=Me, Et, *n*-Bu, *t*-Bu, Ph and MePh<sub>2</sub>). The  $\delta P$  was obtained by quantum chemical calculation (B97-2/pcsSeg-2) and experimentally (NMR in solution in CDCl<sub>3</sub>).

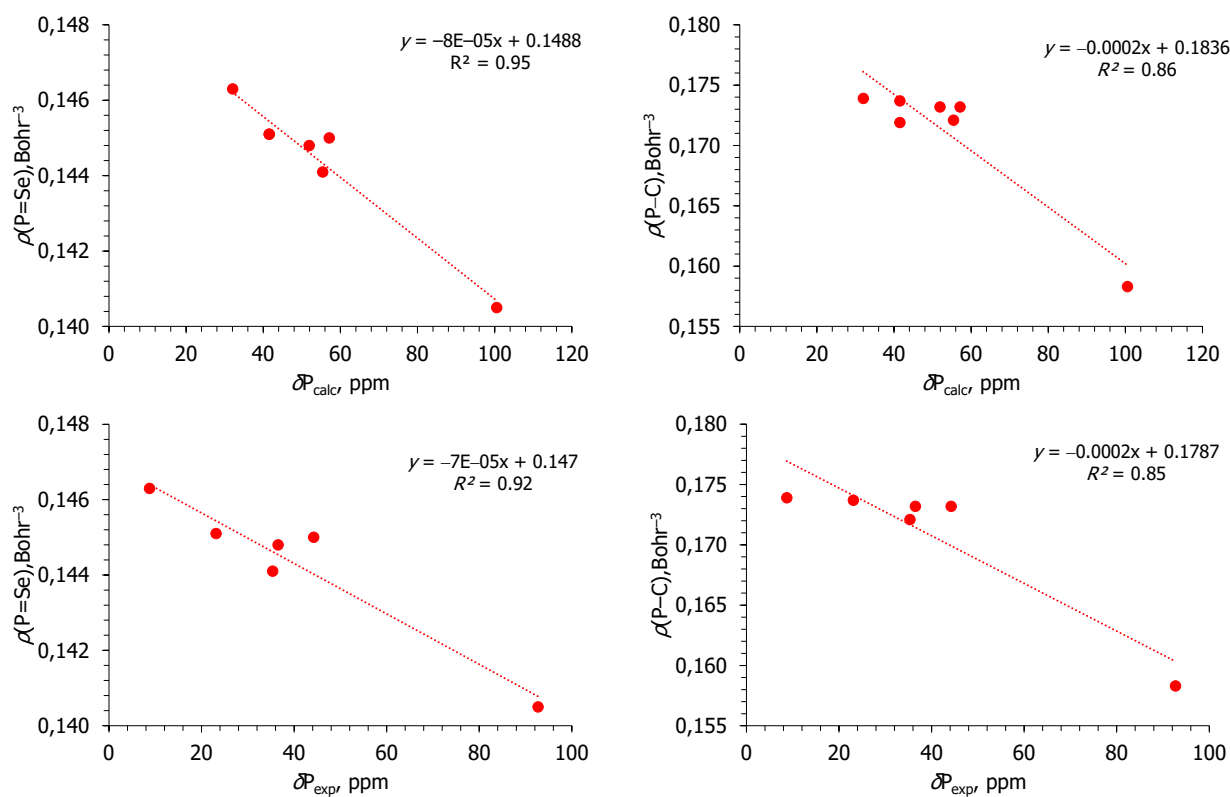

**Figure S8.** Dependences of the  $\delta\mathcal{P}$  NMR with the kinetic ( $G$ ) energy densities of electrons at electron density critical points of type (3, -1) for P=Se and P-C bonds for  $R_3P=Se$  (where  $R=Me, Et, n-Bu, t-Bu, Ph$  and  $MePh_2$ ). The  $\delta\mathcal{P}$  was obtained by quantum chemical calculation (B97-2/pcsSeg-2) and experimentally (NMR in solution in  $CDCl_3$ ).

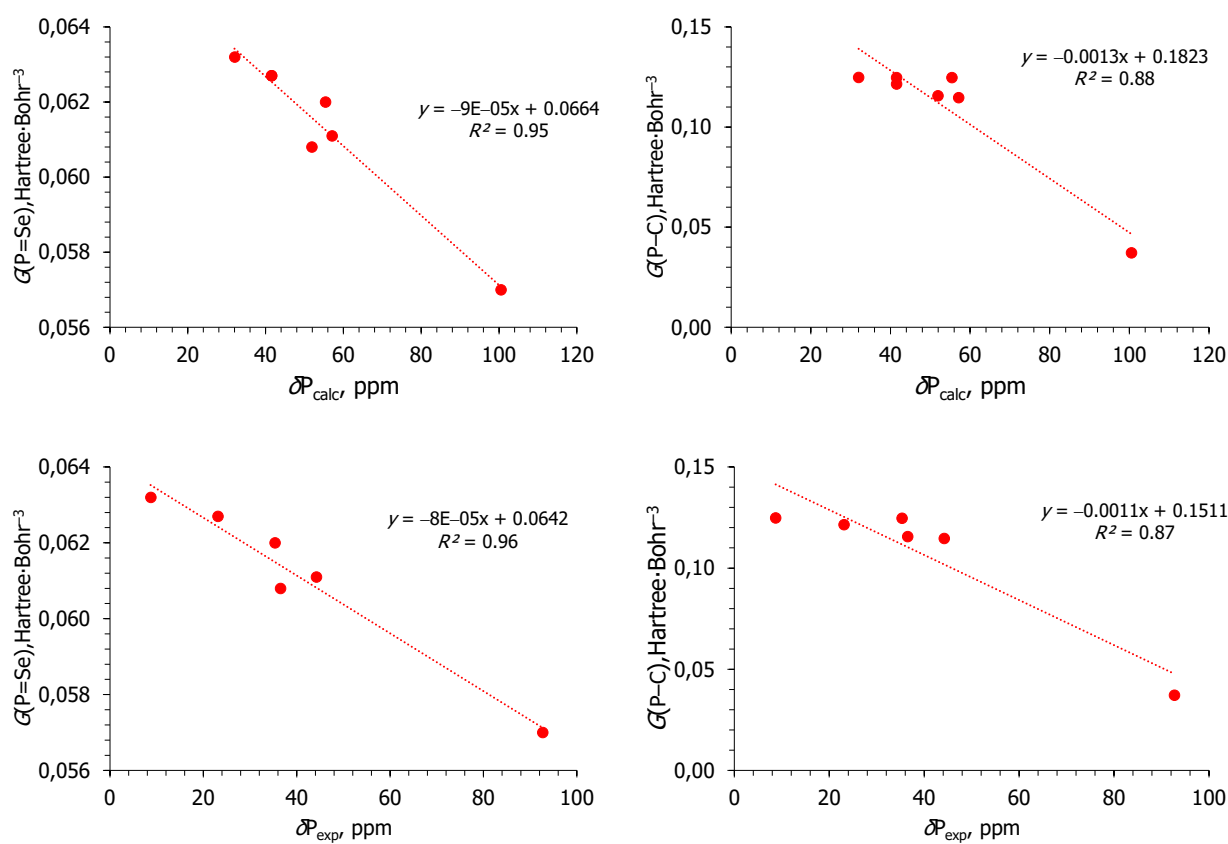

**Figure S9.** Dependences of the  $\delta\text{Se}$  NMR with the electron density values ( $\rho$ ) at electron density critical points of type (3, -1) for P=Se and P-C bonds for  $\text{R}_3\text{P}=\text{Se}$  (where R=Me, Et, *n*-Bu, *t*-Bu, Ph and MePh<sub>2</sub>). The  $\delta\text{P}$  was obtained by quantum chemical calculation (B97-2/pcsSeg-2) and experimentally (NMR in solution in  $\text{CDCl}_3$ ).

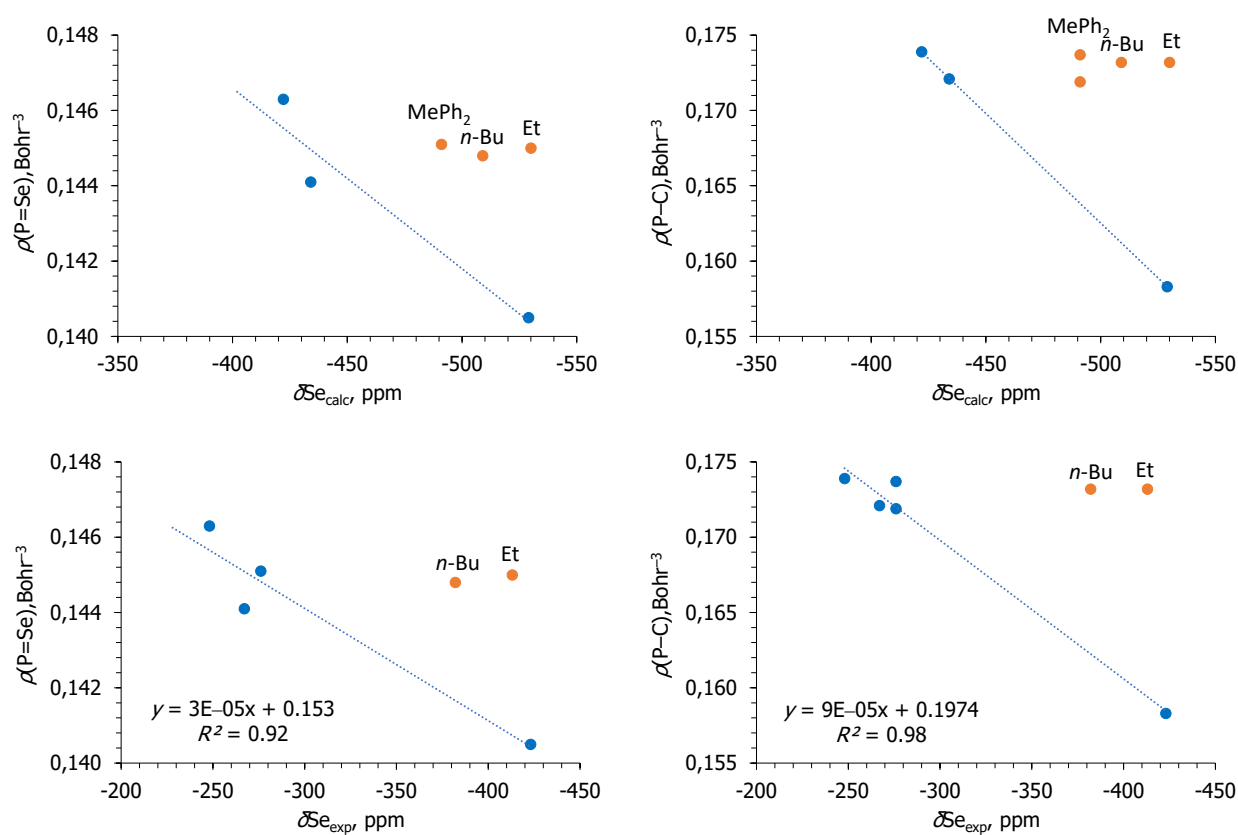

**Figure S10.** Dependences of the  $\delta\text{Se}$  NMR with the kinetic ( $G$ ) energy densities of electrons at electron density critical points of type (3, -1) for P=Se and P-C bonds for  $\text{R}_3\text{P}=\text{Se}$  (where R=Me, Et, *n*-Bu, *t*-Bu, Ph and MePh<sub>2</sub>). The  $\delta\text{P}$  was obtained by quantum chemical calculation (B97-2/pcsSeg-2) and experimentally (NMR in solution in  $\text{CDCl}_3$ ).

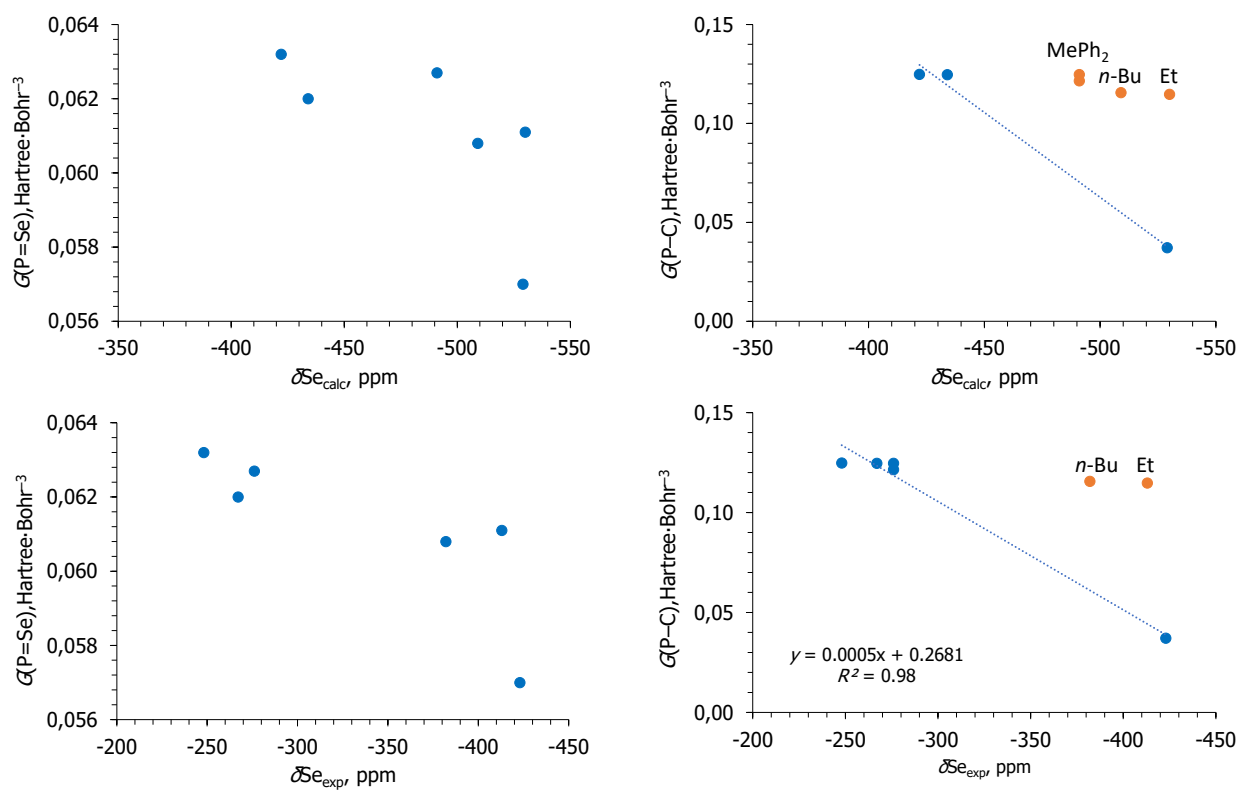

**Figure S11.** Dependences of the  ${}^1J_{\text{PSe}}$  with the electron density Laplacian  $\nabla^2\rho$  at electron density critical points of type (3, -1) for P=Se and P-C bonds for  $\text{R}_3\text{P=Se}$  (where R=Me, Et, *n*-Bu, *t*-Bu, Ph and MePh<sub>2</sub>). The  $J_{\text{PSe}}$  was obtained by quantum chemical calculation (B97-2/pcsSeg-2) and experimentally (NMR in solution in  $\text{CDCl}_3$ ).

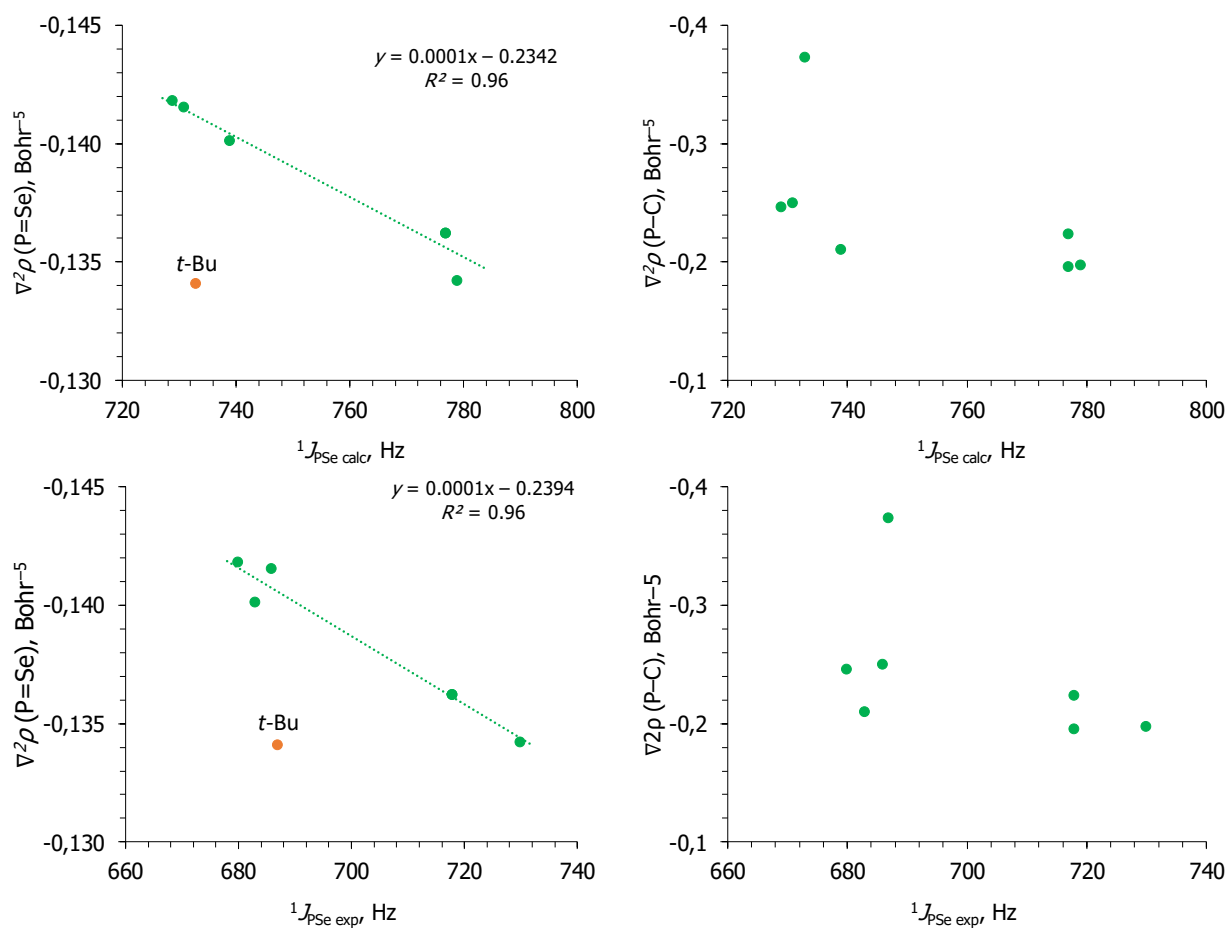



**Figure S12.** A graphical visualization of donor-acceptor (DA) interactions of natural bonding orbitals (NBOs) on an example of *n*-Bu<sub>3</sub>PSe. The captions are made according to Table 3.

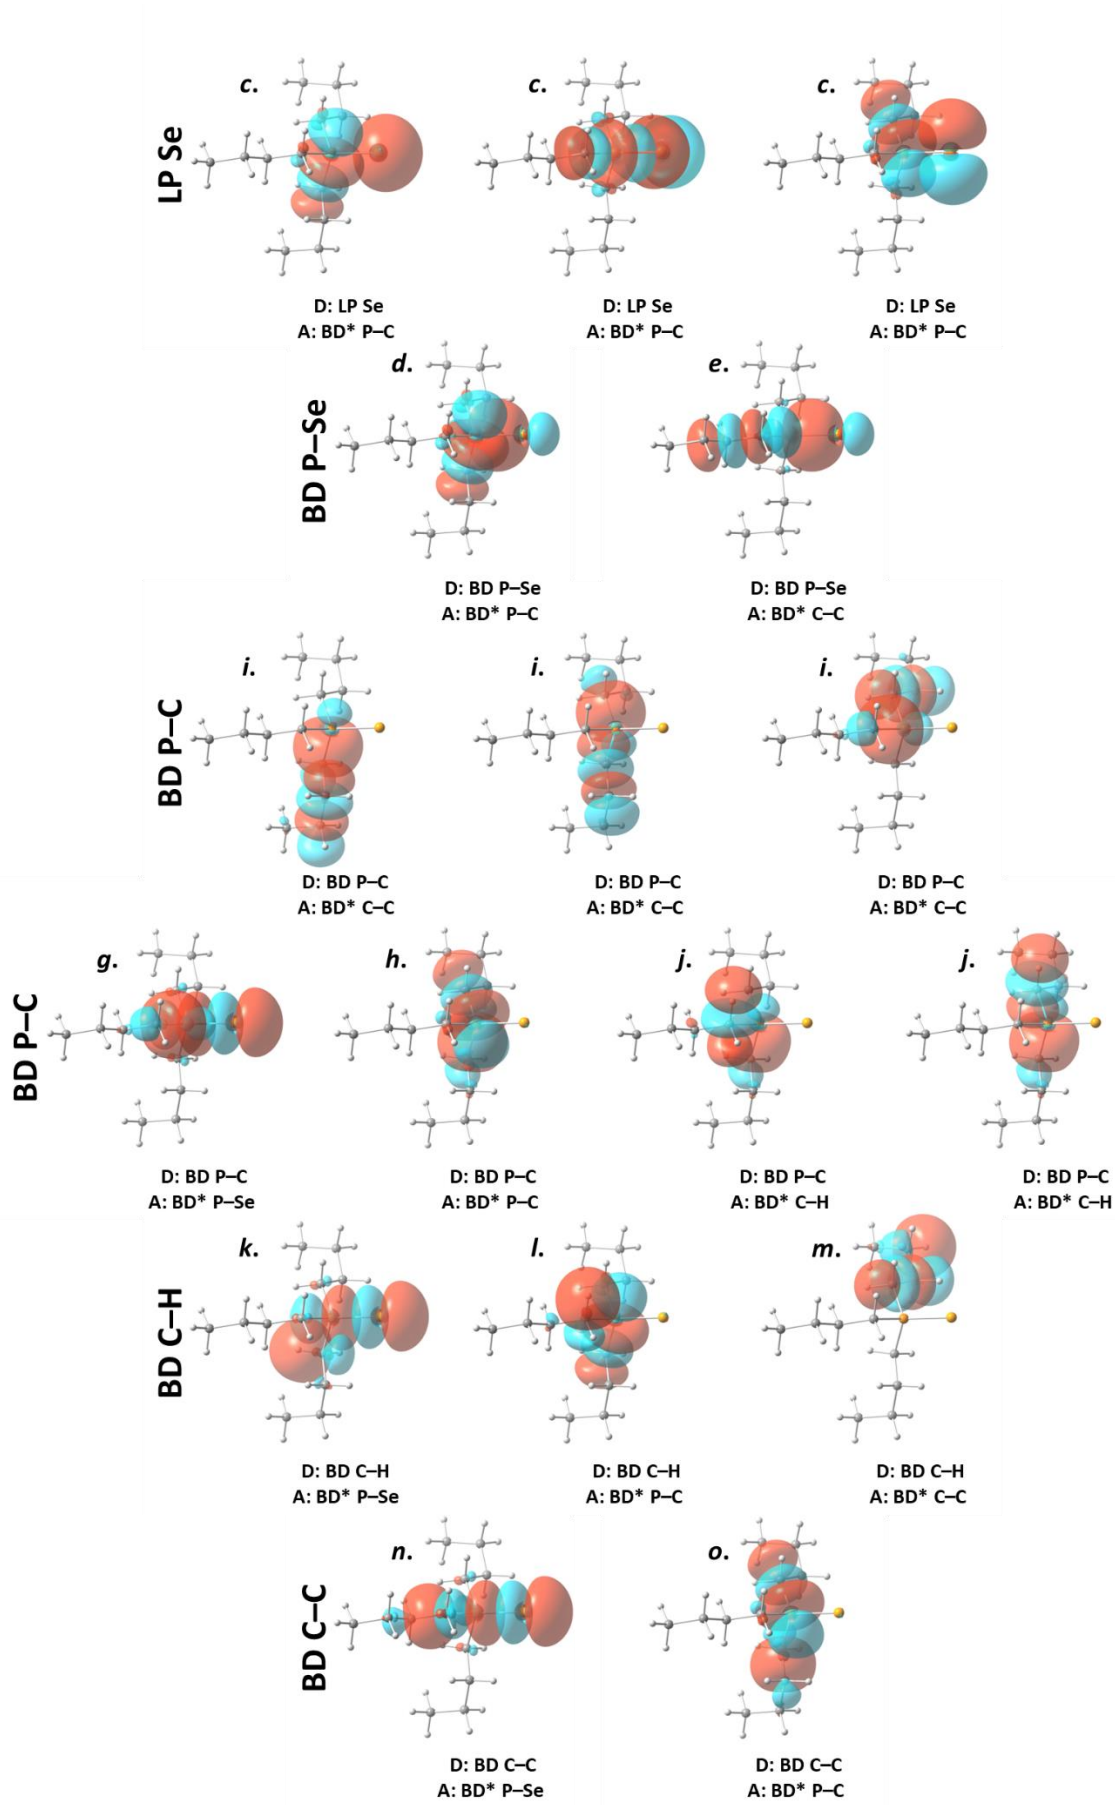

**Figure S13.** Dependences of the coupling constant  $^1J_{\text{PSe}}$  with the energy of interaction between lone pairs (LP) of selenium atom and the BD\* orbital of the P–C bond in studied phosphine selenides  $\text{R}_3\text{P}=\text{Se}$  (where  $\text{R}=\text{Me}$ ,  $\text{Et}$ ,  $n\text{-Bu}$ ,  $t\text{-Bu}$  and  $\text{Ph}$ ). NMR parameters were obtained by quantum chemical calculation in vacuum (B97-2/pcsSeg-2) and NMR spectroscopy in solution in  $\text{CDCl}_3$ . NBO analysis was carried by quantum chemical calculation in vacuum (PW6B95-D3/def2-QZVP).

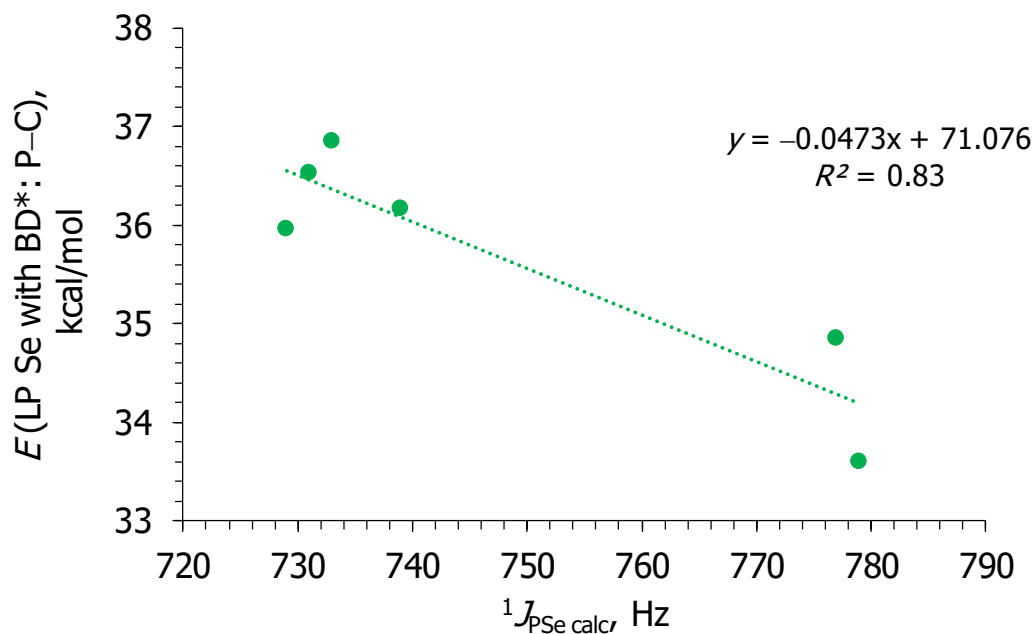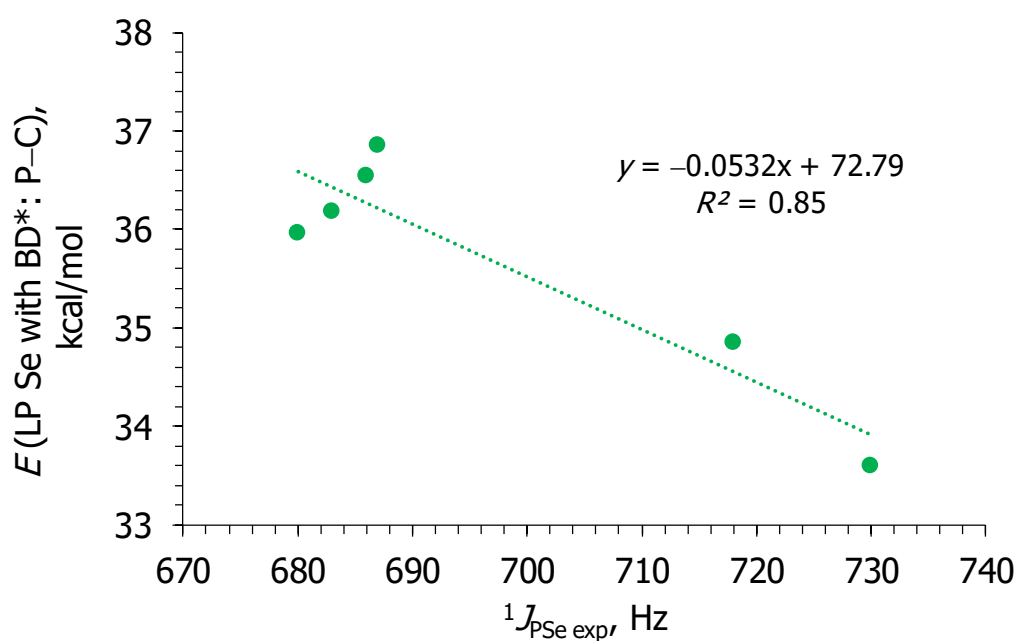

**Figure S14.** Dependence of the  $^{31}\text{P}$  NMR isotropic chemical shift with the P–C bond length in studied phosphine selenides  $\text{R}_3\text{P}=\text{Se}$  (where  $\text{R}=\text{Me}$ ,  $\text{Et}$ ,  $n\text{-Bu}$ ,  $t\text{-Bu}$ ,  $\text{Ph}$  and  $\text{MePh}_2$ ) in solid state (green points), solution (orange points) and vacuum (blue points).

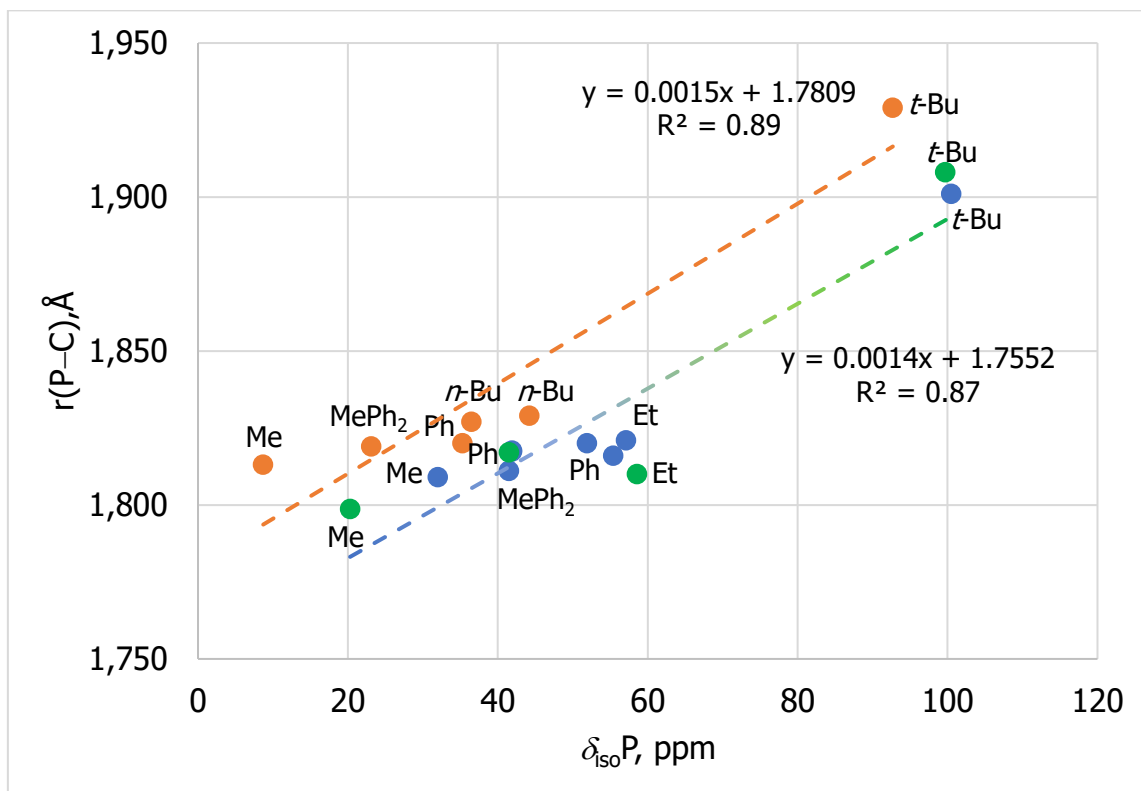

The data points obtained experimentally by MAS NMR and those calculated theoretically lie on the same correlation line (black). The points obtained for measurements in solution lie higher on their correlation line (orange), but at the same slope.

**Figure S15.** Dependence of the  $^{77}\text{Se}$  NMR isotropic chemical shift with the P–C bond length in studied phosphine selenides  $\text{R}_3\text{P}=\text{Se}$  (where  $\text{R}=\text{Me}$ ,  $\text{Et}$ ,  $n\text{-Bu}$ ,  $t\text{-Bu}$ ,  $\text{Ph}$  and  $\text{MePh}_2$ ) in solid state (green points), solution (orange points) and vacuum (blue points).

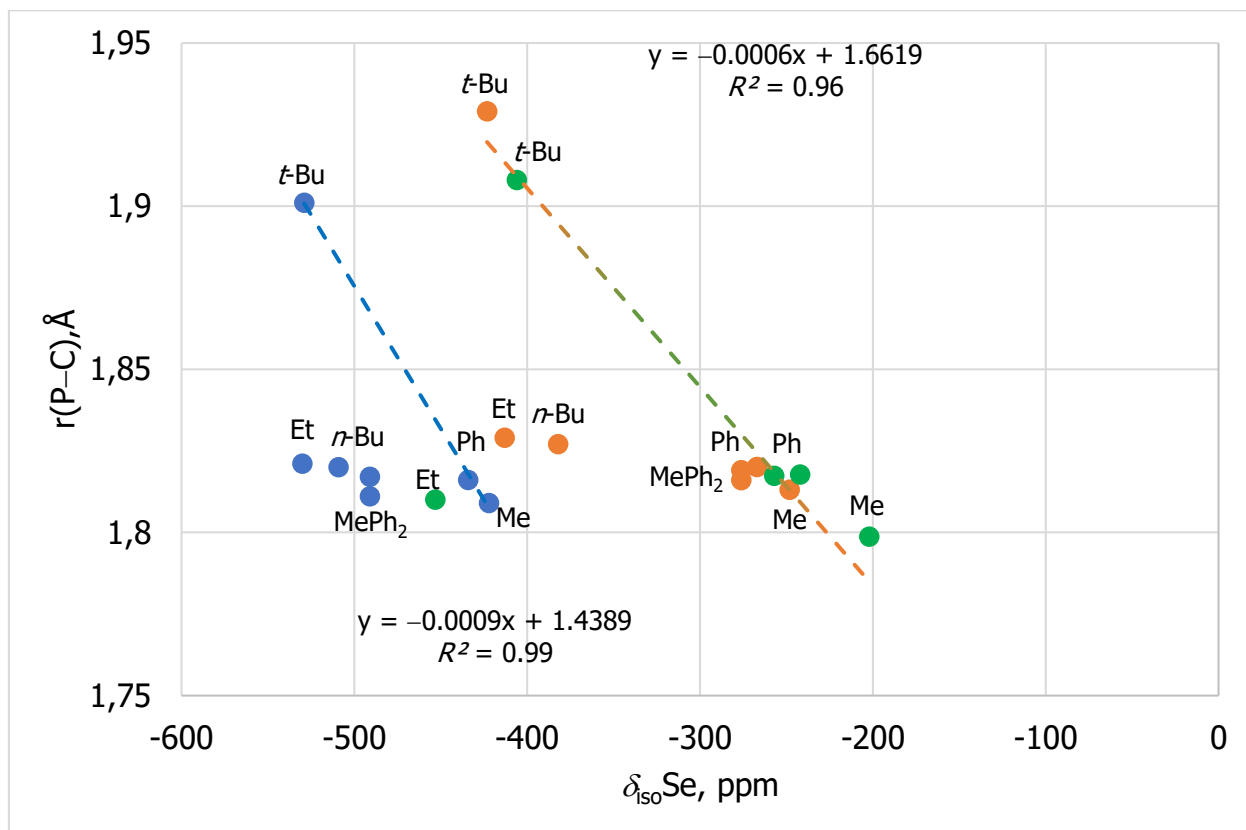

The data points obtained for measurements in solid state and solution lie on the same correlation line (black). Only three points corresponding to  $\text{Et}_3\text{P}=\text{Se}$  and  $n\text{-Bu}_3\text{P}=\text{Se}$ , in which the substituent is conjugated with the phosphorus atom, drop out from the general dependence. The points obtained for measurements in solution lie higher on their correlation line (orange), but at the same slope. For this dependence, only three points lie on the correlation line, corresponding to  $\text{R}_3\text{P}=\text{Se}$ , (where  $\text{R}=\text{Me}$ ,  $\text{Ph}$  and  $t\text{-Bu}$ ).
